# Supplementary material for: LEDGF/p75 interacts with divergent lentiviral integrases and modulates their enzymatic activity in vitro
Source: PubMed Central journal article supplement — Nucleic Acids Res. 2006 Dec 7;35(1):113–24. doi: 10.1093/nar/gkl885 (PMC1802576; doi:10.1093/nar/gkl885), 2006-12-07
Supplement: nar_gkl885_2.pdf [file nar_gkl885_2.pdf]

1 10 20 30 40 50 60 70 80 90 100 110  
human MTRDFKPGDLIFAKMKGYPHWPARVDEVPDGAVKPPTNKLPIFFFGTHETAFLGPKDIFPYSENKEKYGKPNKRKGFNEGLWEIDNPKVKFSSQQAATKQSNASSDVEV  
bovine MTRDFKPGDLIFAKMKGYPHWPARVDEVPDGAVKPPTNKLPIFFFGTHETAFLGPKDIFPYSENKEKYGKPNKRKGFNEGLWEIDNPKVKFSSQQAATKQSNASSDVEV  
equine MTRDFKPGDLIFAKMKGYPHWPARVDEVPDGAVKPPTNKLPIFFFGTHETAFLGPKDIFPYSENKEKYGKPNKRKGFNEGLWEIDNPKVKFSSQQAATKQSNASSDVEV

120 130 140 150 160 170 180 190 200 210 220  
human EEKETS VKSKEDTDHEEKAS NEDVTKAVDITTPKAAARRGRKRKAEKCVETEEAGVVTATASVNLKVS PKRGRPAATEVKIPKPRGRPKMVKQPCPSES DMITEEDKSKKK  
bovine EEKETS VKSKEDTDHEEKAS NEDVTKAVDITTPKAAARRGRKRKAEKCVETEEAGVVTATASVNLKVS PKRGRPAATEVKIPKPRGRPKMVKQPCPSES DMITEEDKSKKK  
equine EEKETS VKSKEDTDHEEKAS NEDVTKAVDITTPKAAARRGRKRKAEKCVETEEAGVVTATASVNLKVS PKRGRPAATEVKIPKPRGRPKMVKQPCPSES DMITEEDKSKKK

230 240 250 260 270 280 290 300 310 320 330  
human GQEEKQPKKQPKKDEEGQKEEDKPRKEPDKKEGKKEVESKRKNLAKTGVTSTSDSEEEGDDQEGEKRRKGRNFQTAHRRNMLKGOHEKEEAADRKRKQEEQMETEQQNKD  
bovine GQEEKQPKKQLKKDEEGQKEEDKPRKEPDKKEGKKEVESKRKNLAKTGVTSTSDSEEEGDDQEGEKRRKGRNFQTAHRRNMLKGOHEKEEAADRKRKQEEQMETEQQNKD  
equine GQEEKQPKKQLKKDEEGQKEEDKPRKEPDKKEGKKEVESKRKNLAKTGVTSTSDSEEEGDDQEGEKRRKGRNFQTAHRRNMLKGOHEKEEAADRKRKQEEQMETEQQNKD

340 350 360 370 380 390 400 410 420 430 440  
human EGKKPEVKKVEKKRETSMDSRLQRIHAEIKNSLKDIDNLDVNRRCIEALDELASLQVTMQQAQKHEMITLEKIRRFKVSQVIMEKSTMLYNKFKNMFLVGEGDSVITQVL  
bovine EGKKPEVKKVEKKRETSMDSRLQRIHAEIKNSLKDIDNLDVNRRCIEALDELASLQVTMQQAQKHEMITLEKIRRFKVSQVIMEKSTMLYNKFKNMFLVGEGDSVITQVL  
equine EGKKPEVKKVEKKRETSMDSRLQRIHAEIKNSLKDIDNLDVNRRCIEALDELASLQVTMQQAQKHEMITLEKIRRFKVSQVIMEKSTMLYNKFKNMFLVGEGDSVITQVL

450 460 470 480 490 500 510 520 530  
human NKSLAEQRQHEEANKTKDQGGKGPNNKLEKEQTGSKTLNGGSDAQDGNQPOHNGDSNEEDSKDNHEASTKKKPSSEERETEISLKDSTLDN  
bovine NKSLAEQRQHEEANKTKDQGGKGPNNKLEKEQTGSKTLNGGSDAQDGNQPOHNGDSNEEDSKDNHEASTKKKPSSEERETEISLKDSTLDN  
equine NKSLAEQRQHEEANKTKDPGGKGPNNKLEKEQTGSKTLNGGSDAQDGNQPOHNGDSNEEDSKDSHEASTKKKPSSEERETEISLKESTLDN
