# Supplementary figures and images for: LEDGF/p75 interacts with divergent lentiviral integrases and modulates their enzymatic activity in vitro
Source: PubMed Central journal article supplement — Nucleic Acids Res. 2006 Dec 7;35(1):113–24. doi: 10.1093/nar/gkl885 (PMC1802576; doi:10.1093/nar/gkl885), 2006-12-07

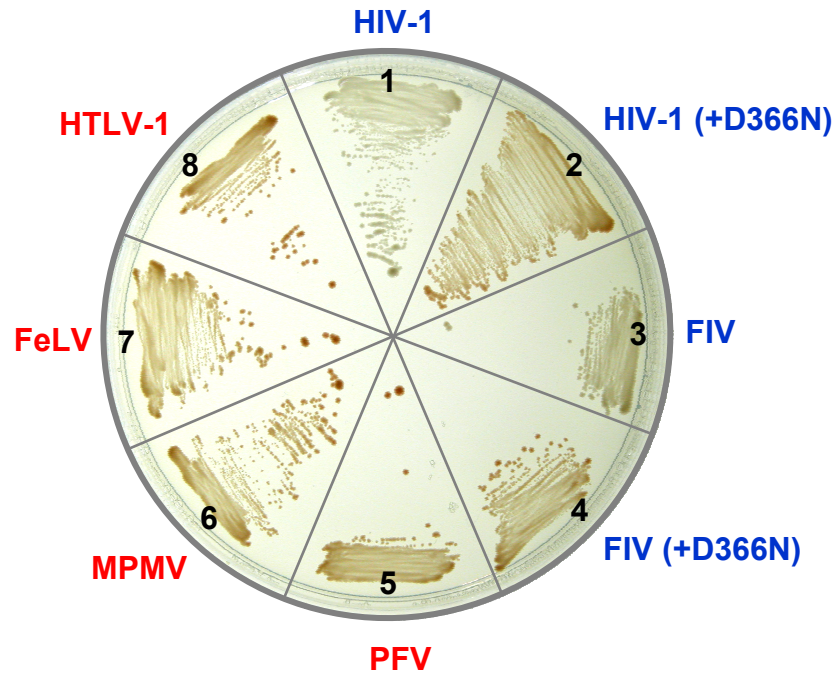

SD/-Leu/-Trp

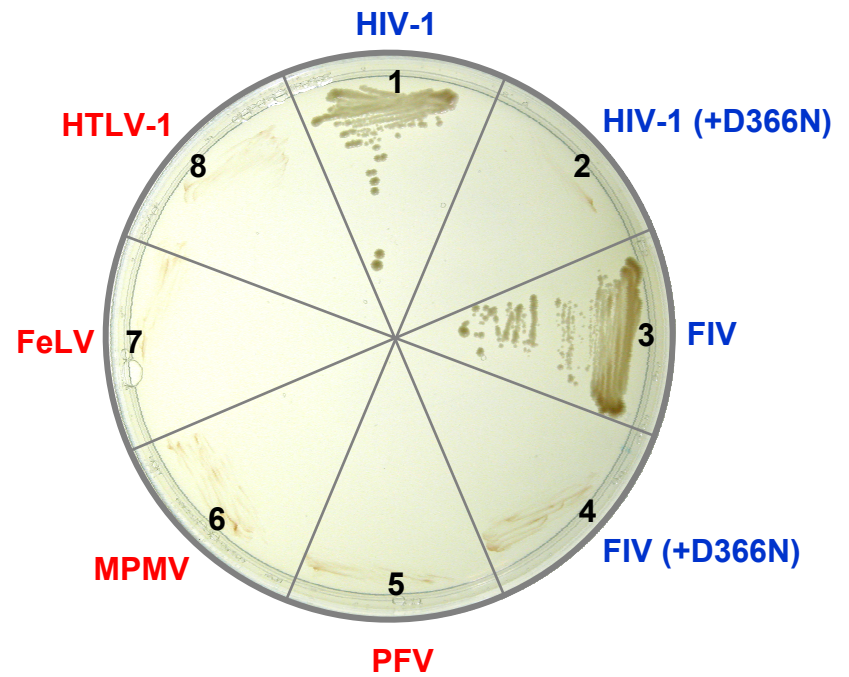

SD/-Leu/-Trp/-His/-Ade

Supplement: nar_gkl885_1.pdf [file nar_gkl885_1.pdf]

# EIAV

Base frequency

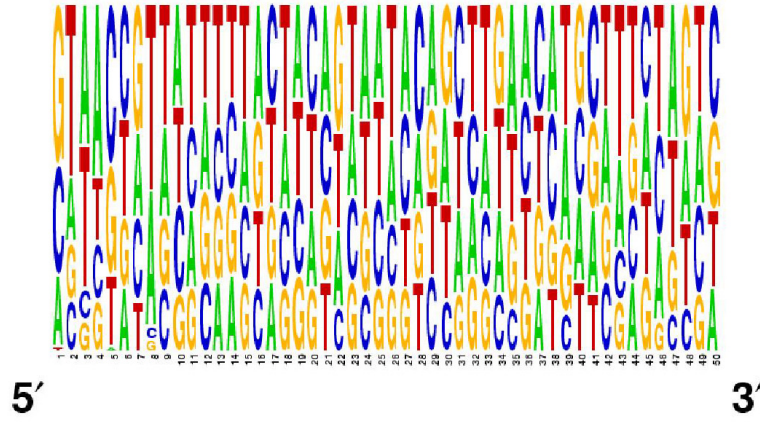

Information content

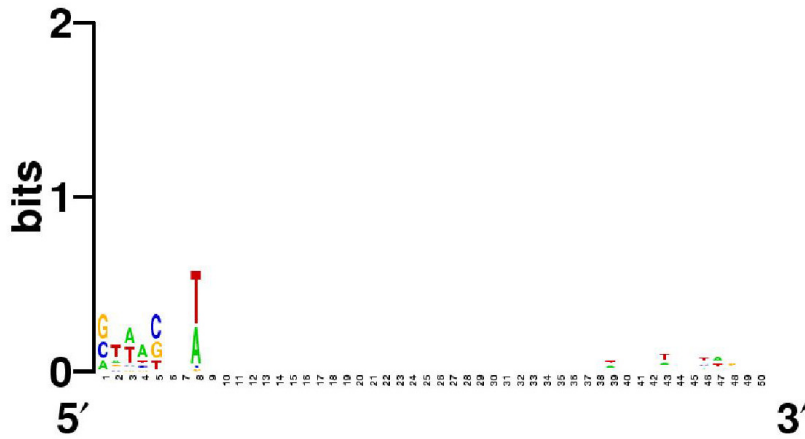

# BIV

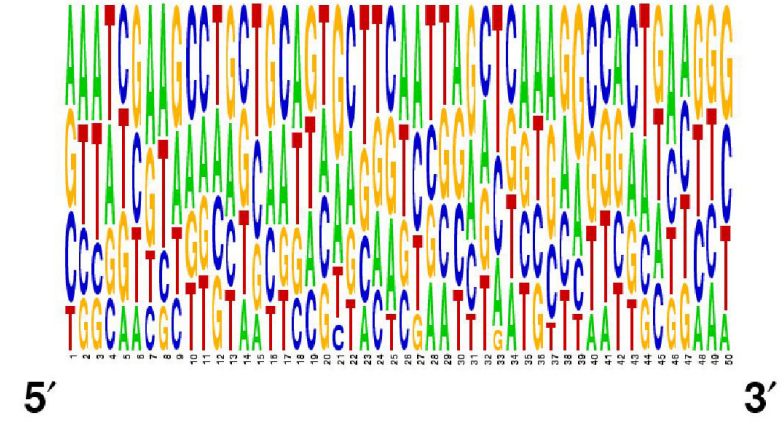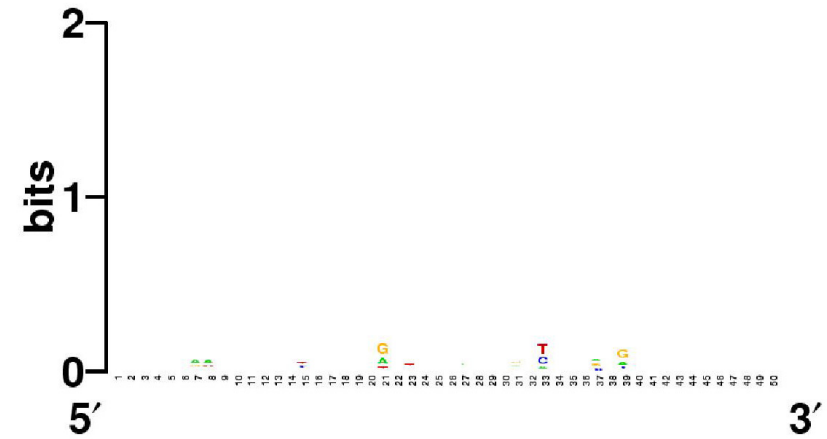

Supplement: nar_gkl885_3.pdf [file nar_gkl885_3.pdf]
